# Supplementary material for: Evaluating inter-study variability in phthalate and trace element analyses within the Children’s Health Exposure Analysis Resource (CHEAR) using multivariate control charts
Source: PubMed Central journal article supplement (PMC7952263; doi:10.1038/s41370-021-00293-w), 2021-02-18
Supplement: 41370_2021_293_MOESM2_ESM.pdf [file 41370_2021_293_MOESM2_ESM.pdf]

Table S2. Values from the seven common phthalates measured in CHEAR QC pools A and B from 5 CHEAR studies. Batch numbers are provided per study and overall. All values are reported in ng/mL.

|         |           | Pool |       |       |       |      |      |      |      |       |       |       |      |       |      |
|---------|-----------|------|-------|-------|-------|------|------|------|------|-------|-------|-------|------|-------|------|
|         |           | A    |       |       |       |      |      |      | B    |       |       |       |      |       |      |
| Study # | Run order | MBZP | MECPP | MEHHP | MEOHP | MEP  | MIBP | MNBP | MBZP | MECPP | MEHHP | MEOHP | MEP  | MIBP  | MNBP |
| 1       | 1         | 0.96 | 5.23  | 2.89  | 1.82  | 11.9 | 3.75 | 5.92 | 1.31 | 6.27  | 4.17  | 2.39  | 12.0 | 11.40 | 8.16 |
|         | 2         | 0.85 | 5.10  | 2.80  | 1.75  | 12.1 | 2.89 | 5.72 | 1.29 | 6.43  | 4.42  | 2.50  | 11.6 | 4.01  | 6.86 |
|         | 3         | 0.77 | 5.10  | 2.64  | 1.72  | 14.9 | 3.04 | 5.45 | 1.28 | 6.28  | 4.36  | 2.53  | 14.0 | 4.25  | 6.74 |
|         | 4         | 0.76 | 5.07  | 2.74  | 1.72  | 15.1 | 0.71 | 4.57 | 1.15 | 6.13  | 4.02  | 2.26  | 15.7 | 4.06  | 5.95 |
| 2       | 5         | 1.03 | 7.40  | 3.10  | 2.21  | 15.9 | 3.65 | 6.85 | 1.36 | 8.49  | 4.19  | 2.53  | 15.4 | 4.87  | 6.55 |
|         | 6         | 1.05 | 7.29  | 3.14  | 2.15  | 15.1 | 3.04 | 6.59 | 1.35 | 8.55  | 4.10  | 2.66  | 15.4 | 3.17  | 6.65 |
|         | 7         | 1.09 | 7.19  | 3.19  | 2.22  | 15.6 | 2.55 | 6.24 | 1.38 | 8.52  | 4.02  | 2.66  | 15.6 | 3.43  | 6.65 |
|         | 8         | 1.09 | 7.10  | 2.91  | 2.21  | 15.6 | 3.30 | 6.27 | 1.41 | 8.56  | 3.87  | 2.63  | 15.7 | 2.94  | 6.39 |
|         | 9         | 0.94 | 7.07  | 2.61  | 1.99  | 14.8 | 2.96 | 6.12 | 1.36 | 8.56  | 4.04  | 2.53  | 15.5 | 2.77  | 6.17 |
|         | 10        | 0.97 | 7.08  | 2.81  | 2.09  | 15.5 | 2.52 | 5.92 | 1.42 | 9.16  | 3.70  | 2.69  | 15.1 | 3.13  | 6.14 |
|         | 11        | 1.00 | 6.96  | 2.92  | 1.99  | 15.2 | 3.36 | 6.04 | 1.36 | 9.25  | 3.69  | 2.80  | 16.3 | 3.39  | 6.30 |
|         | 12        | 1.00 | 6.92  | 3.09  | 1.95  | 14.7 | 2.03 | 6.05 | 1.36 | 8.80  | 3.43  | 2.53  | 16.1 | 3.07  | 6.37 |
|         | 13        | 0.98 | 7.54  | 2.96  | 2.00  | 16.1 | 2.49 | 6.20 | 1.45 | 8.53  | 4.47  | 2.61  | 16.4 | 2.85  | 6.07 |
|         | 14        | 1.08 | 7.57  | 2.82  | 2.12  | 16.1 | 2.53 | 6.35 | 1.43 | 8.54  | 4.60  | 2.64  | 16.2 | 3.74  | 6.08 |
|         | 15        | 0.98 | 7.48  | 2.74  | 2.05  | 15.4 | 2.76 | 6.42 | 1.52 | 9.69  | 4.79  | 2.68  | 17.1 | 3.56  | 6.19 |
|         | 16        | 1.10 | 7.75  | 3.11  | 2.09  | 16.4 | 3.08 | 7.08 | 1.40 | 9.34  | 4.67  | 2.69  | 17.0 | 4.90  | 7.00 |
|         | 17        | 1.06 | 7.62  | 3.24  | 2.05  | 16.4 | 3.13 | 6.62 | 1.41 | 9.46  | 4.42  | 2.60  | 17.4 | 4.78  | 6.30 |
|         | 18        | 1.03 | 7.25  | 2.99  | 2.00  | 14.8 | 3.14 | 5.94 | 1.43 | 9.39  | 4.33  | 2.67  | 17.7 | 3.55  | 6.89 |
|         | 19        | 0.97 | 7.36  | 2.97  | 1.97  | 14.5 | 3.80 | 5.93 | 1.40 | 9.45  | 4.59  | 2.65  | 18.0 | 4.34  | 6.59 |
|         | 20        | 1.04 | 7.19  | 2.73  | 2.02  | 14.6 | 2.72 | 5.86 | 1.38 | 9.29  | 4.41  | 2.67  | 17.0 | 3.50  | 6.76 |
|         | 21        | 1.07 | 7.47  | 3.09  | 2.13  | 16.0 | 3.20 | 6.16 | 1.38 | 9.19  | 4.20  | 2.61  | 16.2 | 3.32  | 6.17 |
|         | 22        | 1.06 | 7.66  | 3.18  | 2.15  | 15.3 | 2.83 | 6.32 | 1.36 | 9.15  | 4.24  | 2.64  | 15.2 | 3.77  | 6.08 |
|         | 23        | 0.90 | 7.53  | 2.74  | 1.93  | 14.9 | 2.66 | 5.80 | 1.41 | 9.41  | 4.27  | 2.59  | 16.9 | 3.78  | 6.56 |
|         | 24        | 0.86 | 7.09  | 2.82  | 1.93  | 15.0 | 2.76 | 5.65 | 1.44 | 9.45  | 4.08  | 2.59  | 16.9 | 3.56  | 6.39 |
|         | 25        | 0.91 | 7.12  | 2.84  | 1.94  | 14.6 | 1.95 | 5.61 | 1.48 | 9.51  | 4.23  | 2.69  | 16.9 | 3.60  | 6.19 |
|         | 26        | 0.80 | 7.08  | 2.79  | 1.93  | 13.9 | 3.05 | 5.85 | 1.38 | 8.96  | 4.00  | 2.57  | 15.0 | 2.38  | 5.98 |
|         | 27        | 0.90 | 7.11  | 2.77  | 1.95  | 15.8 | 3.35 | 6.61 | 1.22 | 8.83  | 4.06  | 2.64  | 16.7 | 2.46  | 5.68 |
|         | 28        | 0.94 | 7.14  | 2.75  | 2.01  | 15.3 | 2.52 | 6.28 | 1.27 | 9.23  | 4.06  | 2.58  | 17.5 | 3.39  | 6.25 |

Table S2. Values from the seven common phthalates measured in CHEAR QC pools A and B from 5 CHEAR studies. Batch numbers are provided per study and overall. All values are reported in ng/mL.

|         |           | Pool |       |       |       |      |      |      |      |       |       |       |      |      |       |
|---------|-----------|------|-------|-------|-------|------|------|------|------|-------|-------|-------|------|------|-------|
|         |           | A    |       |       |       |      |      |      | B    |       |       |       |      |      |       |
| Study # | Run order | MBZP | MECPP | MEHHP | MEOHP | MEP  | MIBP | MNBP | MBZP | MECPP | MEHHP | MEOHP | MEP  | MIBP | MNBP  |
|         | 29        | 0.97 | 7.00  | 2.73  | 1.93  | 15.3 | 2.60 | 5.46 | 1.48 | 8.85  | 4.05  | 2.60  | 17.3 | 3.43 | 6.53  |
| 3       | 30        | 0.84 | 3.57  | 2.20  | 2.24  | 13.2 | 3.69 | 5.98 | 1.49 | 6.11  | 2.70  | 3.15  | 12.2 | 4.69 | 7.69  |
|         | 31        | 1.05 | 4.73  | 2.21  | 2.67  | 11.3 | 3.95 | 8.25 | 1.56 | 5.42  | 2.93  | 3.20  | 12.1 | 4.62 | 7.76  |
|         | 32        | 0.62 | 3.15  | 1.79  | 1.74  | 15.0 | 3.63 | 7.48 | 1.50 | 4.60  | 3.10  | 2.86  | 11.6 | 3.92 | 8.07  |
|         | 33        | 0.76 | 3.42  | 2.15  | 1.84  | 12.1 | 3.00 | 7.69 | 1.54 | 4.17  | 3.88  | 3.47  | 12.9 | 4.25 | 8.12  |
|         | 34        | 1.35 | 3.83  | 2.13  | 2.75  | 13.5 | 4.65 | 8.90 | 1.37 | 6.10  | 2.83  | 3.36  | 14.9 | 4.70 | 8.00  |
|         | 35        | 1.00 | 4.28  | 2.30  | 2.94  | 13.5 | 4.06 | 8.23 | 1.97 | 5.21  | 3.25  | 3.55  | 14.5 | 5.12 | 9.15  |
|         | 36        | 1.23 | 4.37  | 2.58  | 3.13  | 12.9 | 4.44 | 8.98 | 1.71 | 5.18  | 3.51  | 3.32  | 14.8 | 5.52 | 8.93  |
| 4       | 37        | 1.25 | 4.50  | 2.26  | 2.42  | 13.6 | 3.55 | 8.23 | 1.66 | 6.16  | 3.10  | 3.20  | 15.4 | 4.99 | 8.86  |
|         | 38        | 1.02 | 4.19  | 2.64  | 2.79  | 12.4 | 4.10 | 6.13 | 1.51 | 6.29  | 3.31  | 3.02  | 15.0 | 4.48 | 10.10 |
|         | 39        | 0.94 | 3.93  | 2.20  | 2.84  | 14.4 | 3.71 | 8.40 | 1.50 | 4.84  | 3.64  | 3.49  | 15.7 | 4.04 | 8.24  |
|         | 40        | 0.94 | 3.78  | 2.39  | 2.53  | 14.6 | 3.66 | 9.10 | 1.50 | 5.44  | 3.87  | 2.94  | 14.3 | 5.17 | 8.85  |
|         | 41        | 0.90 | 3.97  | 2.05  | 2.27  | 15.7 | 4.43 | 8.78 | 1.71 | 6.33  | 3.71  | 3.47  | 15.6 | 4.68 | 8.40  |
|         | 42        | 1.04 | 4.28  | 2.02  | 2.48  | 15.0 | 4.25 | 8.41 | 1.48 | 5.36  | 3.58  | 2.59  | 15.1 | 4.58 | 8.47  |
|         | 43        | 0.90 | 4.32  | 2.51  | 2.55  | 13.1 | 4.62 | 8.32 | 1.32 | 6.61  | 3.87  | 3.04  | 14.7 | 5.35 | 8.62  |
|         | 44        | 0.90 | 4.44  | 2.60  | 2.75  | 15.9 | 4.37 | 8.70 | 1.29 | 6.25  | 3.64  | 3.11  | 13.6 | 3.94 | 9.37  |
|         | 45        | 1.05 | 4.99  | 2.29  | 2.46  | 15.3 | 4.89 | 8.72 | 1.73 | 6.65  | 3.61  | 3.00  | 15.9 | 5.47 | 10.20 |
|         | 46        | 1.21 | 4.39  | 2.58  | 2.22  | 15.2 | 4.45 | 9.43 | 1.81 | 6.51  | 3.61  | 4.11  | 16.4 | 5.35 | 9.37  |
|         | 47        | 1.05 | 4.13  | 2.23  | 2.68  | 13.8 | 4.04 | 8.51 | 1.39 | 6.01  | 3.39  | 3.47  | 15.3 | 4.36 | 8.08  |
|         | 48        | 0.82 | 4.59  | 1.99  | 2.10  | 12.9 | 3.31 | 8.30 | 1.14 | 5.53  | 3.91  | 3.65  | 14.5 | 5.24 | 8.73  |
|         | 49        | 1.08 | 3.72  | 2.20  | 1.92  | 10.8 | 4.51 | 8.34 | 1.67 | 5.18  | 3.94  | 2.75  | 15.0 | 5.30 | 10.10 |
|         | 50        | 1.02 | 4.32  | 2.53  | 2.49  | 14.0 | 4.40 | 9.16 | 1.76 | 5.02  | 3.58  | 3.08  | 14.7 | 4.22 | 9.53  |
|         | 51        | 0.99 | 4.93  | 2.23  | 2.86  | 15.2 | 4.83 | 8.66 | 1.49 | 5.42  | 3.77  | 3.37  | 12.0 | 5.59 | 9.01  |
|         | 52        | 0.90 | 4.14  | 2.54  | 2.34  | 13.9 | 4.98 | 8.34 | 1.50 | 5.85  | 3.28  | 3.73  | 14.7 | 4.56 | 7.96  |
|         | 53        | 1.16 | 4.38  | 2.39  | 3.10  | 12.0 | 5.12 | 5.92 | 1.33 | 6.38  | 3.67  | 3.17  | 14.0 | 4.81 | 8.12  |
|         | 54        | 1.07 | 4.46  | 2.65  | 2.29  | 12.9 | 4.34 | 6.44 | 1.50 | 5.97  | 3.84  | 2.77  | 14.2 | 4.69 | 6.87  |
|         | 55        | 1.11 | 4.74  | 2.16  | 2.74  | 14.6 | 4.88 | 8.86 | 1.48 | 6.37  | 3.70  | 3.33  | 14.6 | 5.78 | 9.95  |
|         | 56        | 1.22 | 4.99  | 2.39  | 2.25  | 13.3 | 3.71 | 8.70 | 1.69 | 4.95  | 3.47  | 3.00  | 13.5 | 5.07 | 9.63  |

Table S2. Values from the seven common phthalates measured in CHEAR QC pools A and B from 5 CHEAR studies. Batch numbers are provided per study and overall. All values are reported in ng/mL.

|         |           | Pool |       |       |       |      |      |       |      |       |       |       |      |      |       |
|---------|-----------|------|-------|-------|-------|------|------|-------|------|-------|-------|-------|------|------|-------|
|         |           | A    |       |       |       |      |      |       | B    |       |       |       |      |      |       |
| Study # | Run order | MBZP | MECPP | MEHHP | MEOHP | MEP  | MIBP | MNBP  | MBZP | MECPP | MEHHP | MEOHP | MEP  | MIBP | MNBP  |
| 4       | 57        | 0.81 | 3.32  | 2.10  | 2.29  | 14.1 | 4.13 | 8.64  | 1.45 | 5.97  | 3.35  | 3.22  | 14.0 | 5.53 | 8.99  |
|         | 58        | 1.01 | 3.99  | 2.60  | 2.58  | 11.5 | 4.25 | 7.25  | 1.46 | 5.85  | 3.23  | 2.98  | 14.8 | 5.56 | 9.05  |
|         | 59        | 0.73 | 4.38  | 2.36  | 2.13  | 12.0 | 4.77 | 7.90  | 1.45 | 6.45  | 3.35  | 2.42  | 12.4 | 5.80 | 9.69  |
|         | 60        | 1.04 | 3.44  | 2.75  | 2.28  | 13.9 | 4.49 | 8.38  | 1.24 | 6.25  | 3.67  | 2.79  | 13.4 | 4.46 | 8.67  |
|         | 61        | 1.09 | 4.16  | 2.34  | 2.61  | 14.1 | 3.32 | 9.03  | 1.56 | 6.47  | 3.16  | 3.26  | 15.0 | 3.97 | 9.46  |
|         | 62        | 0.87 | 4.42  | 2.03  | 2.14  | 13.8 | 4.05 | 8.33  | 1.37 | 6.27  | 3.74  | 3.36  | 15.8 | 3.92 | 9.33  |
|         | 63        | 1.06 | 4.84  | 1.94  | 2.48  | 13.5 | 4.54 | 7.69  | 1.84 | 5.96  | 3.16  | 3.16  | 15.2 | 4.34 | 9.70  |
|         | 64        | 1.10 | 4.79  | 2.74  | 3.09  | 12.8 | 4.46 | 7.67  | 1.42 | 5.77  | 3.16  | 2.91  | 14.3 | 4.61 | 7.39  |
|         | 65        | 1.00 | 4.16  | 2.12  | 2.38  | 15.0 | 4.30 | 8.15  | 1.54 | 5.89  | 3.32  | 3.46  | 14.8 | 4.60 | 8.00  |
|         | 66        | 1.07 | 4.07  | 2.69  | 2.31  | 13.5 | 4.12 | 8.66  | 1.80 | 6.45  | 3.41  | 3.34  | 13.5 | 5.62 | 7.84  |
|         | 67        | 1.09 | 4.08  | 1.98  | 3.08  | 14.3 | 4.23 | 9.10  | 1.31 | 5.00  | 3.76  | 2.96  | 13.8 | 4.99 | 9.66  |
|         | 68        | 0.98 | 4.22  | 2.62  | 2.21  | 14.0 | 5.06 | 8.42  | 1.63 | 5.90  | 3.24  | 3.46  | 14.8 | 5.76 | 7.42  |
| 69      | 1.08      | 4.09 | 2.70  | 1.77  | 15.0  | 4.27 | 7.89 | 1.63  | 5.54 | 3.65  | 3.28  | 14.8  | 5.33 | 9.72 |       |
| 5       | 70        | 1.01 | 3.12  | 4.13  | 1.65  | 22.0 | 4.35 | 8.91  | 1.44 | 3.80  | 7.00  | 2.12  | 23.2 | 3.94 | 9.28  |
|         | 71        | 1.00 | 2.99  | 4.00  | 1.54  | 21.8 | 5.06 | 9.48  | 0.99 | 3.63  | 7.52  | 2.15  | 22.5 | 4.25 | 9.78  |
|         | 72        | 1.04 | 3.08  | 4.25  | 1.81  | 22.0 | 4.37 | 9.08  | 1.22 | 3.94  | 7.36  | 2.15  | 23.0 | 5.95 | 9.78  |
|         | 73        | 0.97 | 2.54  | 2.77  | 1.38  | 21.7 | 4.05 | 9.38  | 1.22 | 2.67  | 4.66  | 1.69  | 23.0 | 6.99 | 9.18  |
|         | 74        | 1.09 | 2.61  | 3.20  | 1.42  | 21.9 | 3.67 | 10.30 | 1.43 | 2.79  | 4.50  | 1.59  | 23.0 | 4.45 | 8.58  |
|         | 75        | 0.86 | 2.63  | 2.78  | 1.40  | 22.0 | 5.20 | 10.30 | 1.36 | 2.68  | 4.67  | 1.67  | 22.7 | 6.68 | 9.18  |
|         | 76        | 0.77 | 1.17  | 4.67  | 2.44  | 21.6 | 4.88 | 10.50 | 1.35 | 1.11  | 6.35  | 2.38  | 22.5 | 4.04 | 9.16  |
|         | 77        | 0.89 | 1.26  | 4.96  | 2.08  | 21.8 | 4.48 | 9.67  | 1.52 | 1.23  | 6.57  | 2.65  | 22.7 | 3.96 | 9.17  |
|         | 78        | 0.89 | 0.90  | 4.52  | 2.00  | 21.6 | 4.05 | 9.27  | 1.64 | 1.37  | 7.18  | 2.63  | 23.1 | 4.75 | 9.57  |
|         | 79        | 0.63 | 1.66  | 4.38  | 1.44  | 21.6 | 4.01 | 9.39  | 1.48 | 2.02  | 6.68  | 2.26  | 22.6 | 5.75 | 9.69  |
|         | 80        | 0.79 | 1.91  | 4.87  | 1.56  | 21.7 | 5.17 | 9.39  | 0.66 | 2.18  | 8.63  | 2.28  | 22.6 | 5.24 | 9.49  |
|         | 81        | 0.98 | 1.62  | 3.95  | 1.49  | 22.1 | 5.42 | 8.39  | 1.06 | 2.35  | 8.84  | 1.76  | 22.5 | 5.51 | 9.99  |
|         | 82        | 1.40 | 3.17  | 4.64  | 1.77  | 21.5 | 3.72 | 10.10 | 1.10 | 3.82  | 6.28  | 2.74  | 23.4 | 5.71 | 10.30 |
|         | 83        | 1.18 | 3.12  | 4.68  | 1.48  | 21.9 | 3.71 | 9.32  | 1.33 | 3.68  | 6.38  | 2.07  | 23.3 | 5.52 | 9.52  |
|         | 84        | 1.28 | 3.05  | 4.13  | 1.62  | 22.4 | 4.73 | 10.10 | 1.11 | 3.77  | 6.38  | 2.68  | 23.0 | 5.34 | 10.00 |

Table S2. Values from the seven common phthalates measured in CHEAR QC pools A and B from 5 CHEAR studies. Batch numbers are provided per study and overall. All values are reported in ng/mL.

|         |           | Pool |       |       |       |      |      |       |      |       |       |       |      |      |       |
|---------|-----------|------|-------|-------|-------|------|------|-------|------|-------|-------|-------|------|------|-------|
|         |           | A    |       |       |       |      |      |       | B    |       |       |       |      |      |       |
| Study # | Run order | MBZP | MECPP | MEHHP | MEOHP | MEP  | MIBP | MNBP  | MBZP | MECPP | MEHHP | MEOHP | MEP  | MIBP | MNBP  |
| 5       | 85        | 0.61 | 2.90  | 3.63  | 1.24  | 21.9 | 3.93 | 9.83  | 0.52 | 3.53  | 5.23  | 2.03  | 23.0 | 5.20 | 11.10 |
|         | 86        | 1.02 | 2.87  | 3.54  | 1.77  | 21.8 | 3.60 | 9.53  | 0.99 | 3.51  | 5.01  | 1.79  | 23.0 | 5.18 | 10.20 |
|         | 87        | 1.32 | 2.90  | 3.51  | 1.31  | 21.8 | 4.60 | 11.10 | 1.33 | 3.48  | 5.73  | 2.14  | 22.9 | 5.82 | 10.90 |
|         | 88        | 1.15 | 3.19  | 3.77  | 2.04  | 21.7 | 4.39 | 9.92  | 1.43 | 3.41  | 4.61  | 2.03  | 22.7 | 4.44 | 10.50 |
|         | 89        | 1.33 | 2.93  | 3.30  | 1.90  | 21.6 | 3.94 | 9.72  | 1.05 | 3.28  | 5.11  | 1.99  | 22.8 | 4.90 | 10.10 |
|         | 90        | 1.32 | 2.92  | 2.99  | 1.74  | 21.5 | 4.57 | 10.10 | 1.61 | 3.67  | 5.37  | 2.26  | 22.8 | 4.08 | 10.20 |
