# Supplementary material for: Evaluating inter-study variability in phthalate and trace element analyses within the Children’s Health Exposure Analysis Resource (CHEAR) using multivariate control charts
Source: PubMed Central journal article supplement (PMC7952263; doi:10.1038/s41370-021-00293-w), 2021-02-18
Supplement: 41370_2021_293_MOESM3_ESM.pdf [file 41370_2021_293_MOESM3_ESM.pdf]

Table S3. Values from the 7 common phthalates measured in CHEAR QC pools A and B were z-scored utilizing combined means and SD from all 5 studies combined. Highly negative to highly positive values indicated by color scale red to green, respectively.

| Study # | Run order | Pool  |        |        |        |      |       |       |       |        |        |        |      |       |       |
|---------|-----------|-------|--------|--------|--------|------|-------|-------|-------|--------|--------|--------|------|-------|-------|
|         |           | A     |        |        |        |      |       |       | B     |        |        |        |      |       |       |
|         |           | zMBZP | zMECPP | zMEHHP | zMEOHP | zMEP | zMIBP | zMNBP | zMBZP | zMECPP | zMEHHP | zMEOHP | zMEP | zMIBP | zMNBP |
| 1       | 1         | -0.2  | 0.3    | 0      | -0.7   | -1.2 | -0.1  | -1.3  | -0.5  | 0.1    | -0.1   | -0.7   | -1.4 | 5.8   | -0.1  |
|         | 2         | -1    | 0.2    | -0.1   | -0.9   | -1.2 | -1.1  | -1.4  | -0.5  | 0.2    | 0.1    | -0.5   | -1.5 | -0.5  | -0.9  |
|         | 3         | -1.4  | 0.2    | -0.3   | -0.9   | -0.3 | -0.9  | -1.6  | -0.6  | 0.1    | 0      | -0.5   | -0.8 | -0.3  | -1    |
|         | 4         | -1.5  | 0.2    | -0.2   | -0.9   | -0.3 | -3.6  | -2.1  | -1.2  | 0      | -0.3   | -1     | -0.3 | -0.5  | -1.5  |
| 2       | 5         | 0.2   | 1.5    | 0.3    | 0.2    | 0    | -0.2  | -0.7  | -0.2  | 1.1    | -0.1   | -0.5   | -0.4 | 0.2   | -1.1  |
|         | 6         | 0.3   | 1.4    | 0.3    | 0      | -0.3 | -0.9  | -0.8  | -0.3  | 1.1    | -0.2   | -0.2   | -0.4 | -1.2  | -1.1  |
|         | 7         | 0.6   | 1.4    | 0.4    | 0.2    | -0.1 | -1.5  | -1.1  | -0.1  | 1.1    | -0.3   | -0.2   | -0.4 | -1    | -1.1  |
|         | 8         | 0.6   | 1.3    | 0      | 0.2    | -0.1 | -0.6  | -1    | 0     | 1.1    | -0.4   | -0.3   | -0.3 | -1.4  | -1.3  |
|         | 9         | -0.4  | 1.3    | -0.4   | -0.3   | -0.4 | -1    | -1.1  | -0.2  | 1.1    | -0.2   | -0.5   | -0.4 | -1.6  | -1.4  |
|         | 10        | -0.2  | 1.3    | -0.1   | -0.1   | -0.2 | -1.5  | -1.3  | 0     | 1.4    | -0.5   | -0.1   | -0.5 | -1.2  | -1.4  |
|         | 11        | 0     | 1.2    | 0      | -0.3   | -0.2 | -0.5  | -1.2  | -0.2  | 1.4    | -0.5   | 0.1    | -0.2 | -1    | -1.3  |
|         | 12        | 0     | 1.2    | 0.3    | -0.4   | -0.4 | -2.1  | -1.2  | -0.2  | 1.2    | -0.7   | -0.5   | -0.2 | -1.3  | -1.3  |
|         | 13        | -0.1  | 1.5    | 0.1    | -0.3   | 0    | -1.5  | -1.1  | 0.2   | 1.1    | 0.1    | -0.3   | -0.1 | -1.5  | -1.5  |
|         | 14        | 0.5   | 1.6    | -0.1   | 0      | 0    | -1.5  | -1    | 0.1   | 1.1    | 0.2    | -0.2   | -0.2 | -0.7  | -1.5  |
|         | 15        | -0.1  | 1.5    | -0.2   | -0.2   | -0.2 | -1.2  | -0.9  | 0.5   | 1.6    | 0.4    | -0.2   | 0.1  | -0.9  | -1.4  |
|         | 16        | 0.6   | 1.7    | 0.3    | -0.1   | 0.1  | -0.9  | -0.5  | -0.1  | 1.4    | 0.3    | -0.1   | 0    | 0.3   | -0.8  |
|         | 17        | 0.4   | 1.6    | 0.5    | -0.2   | 0.1  | -0.8  | -0.8  | 0     | 1.5    | 0.1    | -0.3   | 0.1  | 0.2   | -1.3  |
|         | 18        | 0.2   | 1.4    | 0.1    | -0.3   | -0.4 | -0.8  | -1.2  | 0.1   | 1.5    | 0      | -0.2   | 0.2  | -0.9  | -0.9  |
|         | 19        | -0.2  | 1.4    | 0.1    | -0.4   | -0.4 | 0     | -1.3  | -0.1  | 1.5    | 0.2    | -0.2   | 0.3  | -0.2  | -1.1  |
|         | 20        | 0.3   | 1.4    | -0.2   | -0.3   | -0.4 | -1.3  | -1.3  | -0.1  | 1.4    | 0.1    | -0.2   | 0    | -0.9  | -1    |
|         | 21        | 0.4   | 1.5    | 0.3    | 0      | 0    | -0.7  | -1.1  | -0.1  | 1.4    | -0.1   | -0.3   | -0.2 | -1.1  | -1.4  |
|         | 22        | 0.4   | 1.6    | 0.4    | 0      | -0.2 | -1.1  | -1    | -0.2  | 1.4    | -0.1   | -0.2   | -0.5 | -0.7  | -1.5  |
|         | 23        | -0.6  | 1.5    | -0.2   | -0.5   | -0.3 | -1.3  | -1.3  | 0     | 1.5    | -0.1   | -0.3   | 0    | -0.7  | -1.1  |
|         | 24        | -0.9  | 1.3    | -0.1   | -0.5   | -0.3 | -1.2  | -1.4  | 0.1   | 1.5    | -0.2   | -0.3   | 0    | -0.9  | -1.3  |
|         | 25        | -0.6  | 1.3    | -0.1   | -0.4   | -0.4 | -2.1  | -1.5  | 0.3   | 1.5    | -0.1   | -0.1   | 0    | -0.8  | -1.4  |
|         | 26        | -1.3  | 1.3    | -0.1   | -0.5   | -0.6 | -0.9  | -1.3  | -0.1  | 1.3    | -0.3   | -0.4   | -0.5 | -1.9  | -1.5  |
|         | 27        | -0.6  | 1.3    | -0.2   | -0.4   | -0.1 | -0.5  | -0.8  | -0.9  | 1.2    | -0.2   | -0.2   | 0    | -1.8  | -1.7  |
|         | 28        | -0.4  | 1.3    | -0.2   | -0.3   | -0.2 | -1.5  | -1    | -0.6  | 1.4    | -0.2   | -0.4   | 0.2  | -1    | -1.3  |
|         | 29        | -0.2  | 1.3    | -0.2   | -0.5   | -0.2 | -1.4  | -1.6  | 0.3   | 1.2    | -0.2   | -0.3   | 0.1  | -1    | -1.2  |
| 30      | -1        | -0.6  | -0.9   | 0.2    | -0.8   | -0.1 | -1.2  | 0.4   | 0     | -1.3   | 0.8    | -1.3   | 0.1  | -0.4  |       |

Table S3. Values from the 7 common phthalates measured in CHEAR QC pools A and B were z-scored utilizing combined means and SD from all 5 studies combined. Highly negative to highly positive values indicated by color scale red to green, respectively.

| Study # | Run order | Pool  |        |        |        |      |       |       |       |        |        |        |      |       |       |
|---------|-----------|-------|--------|--------|--------|------|-------|-------|-------|--------|--------|--------|------|-------|-------|
|         |           | A     |        |        |        |      |       |       | B     |        |        |        |      |       |       |
|         |           | zMBZP | zMECPP | zMEHHP | zMEOHP | zMEP | zMIBP | zMNBP | zMBZP | zMECPP | zMEHHP | zMEOHP | zMEP | zMIBP | zMNBP |
| 3       | 31        | 0.3   | 0      | -0.9   | 1.2    | -1.4 | 0.1   | 0.3   | 0.7   | -0.3   | -1.1   | 0.9    | -1.3 | 0     | -0.3  |
|         | 32        | -2.4  | -0.8   | -1.5   | -0.9   | -0.3 | -0.2  | -0.2  | 0.4   | -0.6   | -1     | 0.2    | -1.5 | -0.6  | -0.1  |
|         | 33        | -1.5  | -0.7   | -1     | -0.7   | -1.2 | -0.9  | -0.1  | 0.6   | -0.8   | -0.4   | 1.4    | -1.1 | -0.3  | -0.1  |
|         | 34        | 2.2   | -0.5   | -1     | 1.4    | -0.7 | 1     | 0.7   | -0.2  | 0      | -1.2   | 1.2    | -0.5 | 0.1   | -0.2  |
|         | 35        | 0     | -0.2   | -0.8   | 1.9    | -0.7 | 0.3   | 0.2   | 2.5   | -0.4   | -0.9   | 1.6    | -0.7 | 0.4   | 0.6   |
|         | 36        | 1.5   | -0.2   | -0.4   | 2.3    | -0.9 | 0.7   | 0.7   | 1.3   | -0.4   | -0.7   | 1.1    | -0.6 | 0.8   | 0.4   |
| 4       | 37        | 1.6   | -0.1   | -0.9   | 0.7    | -0.7 | -0.3  | 0.2   | 1.1   | 0      | -1     | 0.9    | -0.4 | 0.3   | 0.4   |
|         | 38        | 0.1   | -0.3   | -0.3   | 1.5    | -1.1 | 0.3   | -1.1  | 0.4   | 0.1    | -0.8   | 0.5    | -0.5 | -0.1  | 1.2   |
|         | 39        | -0.4  | -0.4   | -0.9   | 1.6    | -0.5 | -0.1  | 0.3   | 0.4   | -0.5   | -0.6   | 1.4    | -0.3 | -0.5  | 0     |
|         | 40        | -0.4  | -0.5   | -0.7   | 0.9    | -0.4 | -0.2  | 0.8   | 0.4   | -0.3   | -0.4   | 0.4    | -0.7 | 0.5   | 0.4   |
|         | 41        | -0.6  | -0.4   | -1.1   | 0.3    | -0.1 | 0.7   | 0.6   | 1.3   | 0.1    | -0.5   | 1.4    | -0.4 | 0.1   | 0.1   |
|         | 42        | 0.3   | -0.2   | -1.2   | 0.8    | -0.3 | 0.5   | 0.4   | 0.3   | -0.3   | -0.6   | -0.3   | -0.5 | 0     | 0.1   |
|         | 43        | -0.6  | -0.2   | -0.5   | 1      | -0.9 | 0.9   | 0.3   | -0.4  | 0.2    | -0.4   | 0.6    | -0.6 | 0.6   | 0.2   |
|         | 44        | -0.7  | -0.1   | -0.4   | 1.4    | 0    | 0.6   | 0.5   | -0.5  | 0.1    | -0.6   | 0.7    | -0.9 | -0.6  | 0.7   |
|         | 45        | 0.3   | 0.2    | -0.8   | 0.8    | -0.2 | 1.2   | 0.6   | 1.4   | 0.3    | -0.6   | 0.5    | -0.3 | 0.7   | 1.3   |
|         | 46        | 1.3   | -0.2   | -0.4   | 0.2    | -0.2 | 0.7   | 1     | 1.8   | 0.2    | -0.6   | 2.7    | -0.1 | 0.6   | 0.7   |
|         | 47        | 0.3   | -0.3   | -0.9   | 1.3    | -0.7 | 0.3   | 0.4   | -0.1  | 0      | -0.8   | 1.4    | -0.4 | -0.2  | -0.1  |
|         | 48        | -1.2  | -0.1   | -1.2   | -0.1   | -0.9 | -0.6  | 0.3   | -1.2  | -0.2   | -0.3   | 1.8    | -0.7 | 0.5   | 0.3   |
|         | 49        | 0.5   | -0.5   | -0.9   | -0.5   | -1.5 | 0.8   | 0.3   | 1.2   | -0.4   | -0.3   | 0      | -0.5 | 0.6   | 1.2   |
|         | 50        | 0.1   | -0.2   | -0.5   | 0.8    | -0.6 | 0.7   | 0.8   | 1.6   | -0.5   | -0.6   | 0.6    | -0.6 | -0.3  | 0.9   |
|         | 51        | -0.1  | 0.1    | -0.9   | 1.7    | -0.2 | 1.2   | 0.5   | 0.4   | -0.3   | -0.4   | 1.2    | -1.4 | 0.8   | 0.5   |
|         | 52        | -0.6  | -0.3   | -0.5   | 0.5    | -0.6 | 1.3   | 0.3   | 0.4   | -0.1   | -0.8   | 1.9    | -0.6 | 0     | -0.2  |
|         | 53        | 1     | -0.2   | -0.7   | 2.2    | -1.2 | 1.5   | -1.3  | -0.4  | 0.1    | -0.5   | 0.8    | -0.8 | 0.2   | -0.1  |
|         | 54        | 0.4   | -0.1   | -0.3   | 0.4    | -0.9 | 0.6   | -0.9  | 0.4   | 0      | -0.4   | 0      | -0.7 | 0.1   | -0.9  |
|         | 55        | 0.7   | 0      | -1     | 1.4    | -0.4 | 1.2   | 0.6   | 0.3   | 0.1    | -0.5   | 1.1    | -0.6 | 1     | 1.1   |
|         | 56        | 1.4   | 0.2    | -0.7   | 0.3    | -0.8 | -0.1  | 0.5   | 1.3   | -0.5   | -0.7   | 0.5    | -0.9 | 0.4   | 0.9   |
| 57      | -1.2      | -0.8  | -1.1   | 0.4    | -0.6   | 0.4  | 0.5   | 0.2   | 0     | -0.8   | 0.9    | -0.8   | 0.8  | 0.5   |       |
| 58      | 0.1       | -0.4  | -0.4   | 1      | -1.3   | 0.5  | -0.4  | 0.2   | -0.1  | -0.9   | 0.4    | -0.6   | 0.8  | 0.5   |       |
| 59      | -1.7      | -0.2  | -0.7   | 0      | -1.2   | 1.1  | 0     | 0.2   | 0.2   | -0.8   | -0.7   | -1.2   | 1    | 1     |       |
| 60      | 0.3       | -0.7  | -0.2   | 0.3    | -0.6   | 0.8  | 0.3   | -0.8  | 0.1   | -0.5   | 0.1    | -1     | -0.1 | 0.3   |       |

Table S3. Values from the 7 common phthalates measured in CHEAR QC pools A and B were z-scored utilizing combined means and SD from all 5 studies combined. Highly negative to highly positive values indicated by color scale red to green, respectively.

| Study # | Run order | Pool  |        |        |        |      |       |       |       |        |        |        |      |       |       |
|---------|-----------|-------|--------|--------|--------|------|-------|-------|-------|--------|--------|--------|------|-------|-------|
|         |           | A     |        |        |        |      |       |       | B     |        |        |        |      |       |       |
|         |           | zMBZP | zMECPP | zMEHHP | zMEOHP | zMEP | zMIBP | zMNBP | zMBZP | zMECPP | zMEHHP | zMEOHP | zMEP | zMIBP | zMNBP |
| 4       | 61        | 0.6   | -0.3   | -0.7   | 1.1    | -0.6 | -0.6  | 0.8   | 0.7   | 0.2    | -0.9   | 1      | -0.5 | -0.5  | 0.8   |
|         | 62        | -0.8  | -0.2   | -1.2   | 0      | -0.7 | 0.3   | 0.3   | -0.2  | 0.1    | -0.5   | 1.2    | -0.3 | -0.6  | 0.7   |
|         | 63        | 0.4   | 0.1    | -1.3   | 0.8    | -0.7 | 0.8   | -0.1  | 1.9   | 0      | -0.9   | 0.8    | -0.5 | -0.2  | 1     |
|         | 64        | 0.6   | 0      | -0.2   | 2.2    | -0.9 | 0.7   | -0.1  | 0     | -0.1   | -0.9   | 0.3    | -0.7 | 0     | -0.6  |
|         | 65        | 0     | -0.3   | -1     | 0.6    | -0.3 | 0.6   | 0.2   | 0.6   | -0.1   | -0.8   | 1.4    | -0.6 | 0     | -0.2  |
|         | 66        | 0.4   | -0.3   | -0.3   | 0.4    | -0.7 | 0.3   | 0.5   | 1.8   | 0.2    | -0.7   | 1.1    | -0.9 | 0.9   | -0.3  |
|         | 67        | 0.6   | -0.3   | -1.2   | 2.2    | -0.5 | 0.5   | 0.8   | -0.5  | -0.5   | -0.5   | 0.4    | -0.9 | 0.3   | 0.9   |
|         | 68        | -0.1  | -0.3   | -0.4   | 0.2    | -0.6 | 1.4   | 0.4   | 1     | -0.1   | -0.9   | 1.4    | -0.6 | 1     | -0.6  |
|         | 69        | 0.5   | -0.3   | -0.3   | -0.8   | -0.3 | 0.5   | 0     | 1     | -0.2   | -0.5   | 1      | -0.6 | 0.6   | 1     |
| 5       | 70        | 0.1   | -0.9   | 1.7    | -1.1   | 1.8  | 0.6   | 0.7   | 0.1   | -1     | 2.1    | -1.3   | 1.8  | -0.6  | 0.7   |
|         | 71        | 0     | -0.9   | 1.5    | -1.4   | 1.7  | 1.4   | 1     | -1.9  | -1.1   | 2.5    | -1.2   | 1.6  | -0.3  | 1     |
|         | 72        | 0.3   | -0.9   | 1.8    | -0.7   | 1.8  | 0.6   | 0.8   | -0.9  | -0.9   | 2.4    | -1.2   | 1.7  | 1.1   | 1     |
|         | 73        | -0.2  | -1.2   | -0.2   | -1.7   | 1.7  | 0.3   | 1     | -0.9  | -1.5   | 0.3    | -2.1   | 1.7  | 2     | 0.6   |
|         | 74        | 0.6   | -1.1   | 0.4    | -1.6   | 1.7  | -0.2  | 1.6   | 0.1   | -1.4   | 0.1    | -2.3   | 1.7  | -0.1  | 0.2   |
|         | 75        | -0.9  | -1.1   | -0.1   | -1.7   | 1.8  | 1.6   | 1.6   | -0.2  | -1.5   | 0.3    | -2.1   | 1.6  | 1.8   | 0.6   |
|         | 76        | -1.5  | -1.9   | 2.4    | 0.7    | 1.6  | 1.2   | 1.7   | -0.3  | -2.2   | 1.6    | -0.7   | 1.6  | -0.5  | 0.6   |
|         | 77        | -0.7  | -1.9   | 2.8    | -0.1   | 1.7  | 0.8   | 1.2   | 0.5   | -2.1   | 1.8    | -0.2   | 1.6  | -0.5  | 0.6   |
|         | 78        | -0.7  | -2.1   | 2.2    | -0.3   | 1.6  | 0.3   | 0.9   | 1     | -2.1   | 2.3    | -0.3   | 1.7  | 0.1   | 0.9   |
|         | 79        | -2.4  | -1.7   | 2      | -1.6   | 1.6  | 0.2   | 1     | 0.3   | -1.8   | 1.9    | -1     | 1.6  | 1     | 1     |
|         | 80        | -1.4  | -1.5   | 2.7    | -1.3   | 1.7  | 1.6   | 1     | -3.4  | -1.7   | 3.4    | -0.9   | 1.6  | 0.5   | 0.8   |
|         | 81        | -0.2  | -1.7   | 1.4    | -1.5   | 1.8  | 1.8   | 0.3   | -1.6  | -1.6   | 3.6    | -2     | 1.6  | 0.8   | 1.2   |
|         | 82        | 2.5   | -0.8   | 2.4    | -0.8   | 1.6  | -0.1  | 1.4   | -1.4  | -1     | 1.5    | 0      | 1.8  | 0.9   | 1.4   |
|         | 83        | 1.1   | -0.9   | 2.4    | -1.5   | 1.7  | -0.1  | 0.9   | -0.4  | -1     | 1.6    | -1.4   | 1.8  | 0.8   | 0.8   |
|         | 84        | 1.8   | -0.9   | 1.7    | -1.2   | 1.9  | 1     | 1.4   | -1.4  | -1     | 1.6    | -0.2   | 1.7  | 0.6   | 1.2   |
|         | 85        | -2.5  | -1     | 1      | -2     | 1.7  | 0.1   | 1.3   | -4    | -1.1   | 0.7    | -1.4   | 1.7  | 0.5   | 1.9   |
|         | 86        | 0.1   | -1     | 0.9    | -0.8   | 1.7  | -0.3  | 1.1   | -1.9  | -1.1   | 0.5    | -1.9   | 1.7  | 0.5   | 1.3   |
| 87      | 2         | -1    | 0.8    | -1.9   | 1.7    | 0.9  | 2.1   | -0.4  | -1.1  | 1.1    | -1.2   | 1.7    | 1    | 1.8   |       |
| 88      | 1         | -0.8  | 1.2    | -0.2   | 1.7    | 0.7  | 1.3   | 0.1   | -1.2  | 0.2    | -1.4   | 1.6    | -0.1 | 1.5   |       |
| 89      | 2.1       | -1    | 0.6    | -0.5   | 1.6    | 0.1  | 1.2   | -1.6  | -1.2  | 0.6    | -1.5   | 1.7    | 0.3  | 1.2   |       |
|         | 90        | 2     | -1     | 0.1    | -0.9   | 1.6  | 0.9   | 1.4   | 0.9   | -1     | 0.8    | -1     | 1.7  | -0.4  | 1.3   |
